# Supplementary material for: Effective connectivity of the anterior hippocampus predicts recollection confidence during natural memory retrieval
Source: PubMed Central journal article supplement (PMC6242820; doi:10.1038/s41467-018-07325-4), 2018-11-19
Supplement: 41467_2018_7325_MOESM2_ESM.pdf [file 41467_2018_7325_MOESM2_ESM.pdf]

This manuscript has been previously reviewed at another journal that is not operating a transparent peer review scheme. The manuscript was considered suitable for publication without further review at Nature Communications
